# Supplementary material
Source: ML conference proceedings conference paper supplement (https://openaccess.thecvf.com/content/ICCV2023/html/Wang_View_Consistent_Purification_ICCV_2023_paper.html)
Supplement: Supplementary file 1 [file Wang_View_Consistent_Purification_ICCV_2023_supplemental.pdf]

# View Consistent Purification for Accurate Cross-View Localization

## Supplementary Material

Shan Wang<sup>1,2</sup> Yanhao Zhang<sup>1</sup> Akhil Perincherry<sup>3</sup> Ankit Vora<sup>3</sup> Hongdong Li<sup>1</sup>

<sup>1</sup>Australian National University <sup>2</sup>Data61, CSIRO <sup>3</sup>Ford Motor Company

### 1. Evaluation of Other FordAV-CVL Dataset Logs

The 'Log4' trajectory was chosen for method evaluation in SIBCL [1] owing to its alignment accuracy with the satellite image. Furthermore, we also evaluated other logs from the FordAV-CVL Dataset in Tab. 1 to supplement the results presented in Tab. 2 of the main paper. There are three travelings included in every log: '2017-08-04-26', '2017-07-24', and '2017-10-26'. For the purpose of training, evaluation, and test dataset split, we use '2017-07-24' as the evaluation dataset for all logs. We select the traveling sequence with a higher number of images as the training dataset. Specifically, the training dataset of 'Log1' and 'Log3' is '2017-10-26', whereas the training dataset of 'Log4' and 'Log5' is '2017-08-04-26'. The results demonstrate that our method is capable of estimating accurate 3-DoF pose with low spatial and angular errors in various scenarios, including freeway (log1), residential (log3, log5), university (log4) and vegetation (log4, log5).

Table 1: Performance of our method on additional logs of the FordAV-CVL dataset

|      | Lateral |         |        |       |       |       | Longitudinal |         |        |       |       |       | Yaw   |         |       |       |       |
|------|---------|---------|--------|-------|-------|-------|--------------|---------|--------|-------|-------|-------|-------|---------|-------|-------|-------|
|      | mean↓   | median↓ | 0.25m↑ | 0.5m↑ | 1m↑   | 2m↑   | mean↓        | median↓ | 0.25m↑ | 0.5m↑ | 1m↑   | 2m↑   | mean↓ | median↓ | 1°↑   | 2°↑   | 4°↑   |
| Log1 | 0.64    | 0.37    | 34.98  | 62.45 | 84.39 | 91.94 | 0.25         | 0.12    | 82.86  | 90.40 | 95.07 | 98.47 | 2.37  | 0.70    | 58.84 | 70.84 | 81.23 |
| Log3 | 1.07    | 0.99    | 10.64  | 22.83 | 50.60 | 88.89 | 0.96         | 0.70    | 18.79  | 36.44 | 65.89 | 91.22 | 1.82  | 1.07    | 47.86 | 68.90 | 87.59 |
| Log5 | 0.88    | 0.66    | 18.36  | 38.70 | 70.01 | 90.30 | 1.80         | 0.75    | 19.82  | 36.83 | 58.59 | 76.76 | 1.23  | 0.62    | 65.51 | 84.25 | 93.57 |
| ALL  | 1.01    | 0.63    | 21.35  | 41.52 | 66.02 | 85.01 | 0.67         | 0.50    | 26.56  | 50.33 | 80.32 | 95.00 | 1.61  | 0.73    | 67.20 | 82.21 | 88.46 |

ALL: All images from 'Log1', 'Log3', 'Log4', and 'Log5'. 'Log2' and 'Log6' are excluded due to the construction of road and building during data collection.

### 2. Performance with Different Initial Poses

In our main paper, we presented a chart illustration in Fig.7. Here, we further provide complete metrics results in Tab. 2 and Tab. 3. By presenting these tables, we aim to provide a comprehensive view of the data and enable readers to analyze the metrics more thoroughly.

Table 2: Performance of our method in different initial pose of the KITTI-CVL dataset

| translation<br>m | yaw<br>° | Lateral |         |        |       |       |       | Longitudinal |         |        |       |       |       | Yaw   |         |       |       |       |
|------------------|----------|---------|---------|--------|-------|-------|-------|--------------|---------|--------|-------|-------|-------|-------|---------|-------|-------|-------|
|                  |          | mean↓   | median↓ | 0.25m↑ | 0.5m↑ | 1m↑   | 2m↑   | mean↓        | median↓ | 0.25m↑ | 0.5m↑ | 1m↑   | 2m↑   | mean↓ | median↓ | 1°↑   | 2°↑   | 4°↑   |
| 15               | 7.5      | 0.17    | 0.12    | 84.28  | 98.44 | 99.42 | 99.55 | 0.19         | 0.17    | 86.36  | 99.66 | 99.66 | 99.66 | 4.45  | 2.03    | 27.52 | 49.35 | 72.70 |
|                  | 10       | 0.59    | 0.19    | 54.94  | 85.10 | 96.53 | 97.20 | 0.48         | 0.10    | 86.44  | 95.46 | 96.57 | 96.71 | 5.12  | 2.49    | 23.61 | 42.91 | 64.93 |
|                  | 12.5     | 2.32    | 0.20    | 58.54  | 79.51 | 83.57 | 84.72 | 2.10         | 0.18    | 70.68  | 81.65 | 81.71 | 81.78 | 6.24  | 2.70    | 23.07 | 41.34 | 60.64 |
|                  | 15       | 3.98    | 0.25    | 50.25  | 64.27 | 67.24 | 69.28 | 3.80         | 0.20    | 58.45  | 64.63 | 64.81 | 65.06 | 7.87  | 3.59    | 19.89 | 35.32 | 52.96 |
| 30               | 5        | 0.18    | 0.13    | 76.99  | 96.40 | 99.89 | 99.95 | 0.12         | 0.10    | 94.76  | 99.64 | 99.88 | 99.91 | 5.18  | 1.92    | 30.86 | 51.04 | 69.59 |
| 45               |          | 0.55    | 0.25    | 49.12  | 78.88 | 95.27 | 97.21 | 0.49         | 0.21    | 56.86  | 88.82 | 96.22 | 97.06 | 8.94  | 3.16    | 19.94 | 36.22 | 56.45 |
| 60               |          | 0.45    | 0.33    | 39.73  | 70.11 | 95.94 | 99.26 | 0.39         | 0.29    | 44.14  | 79.55 | 97.18 | 99.12 | 16.04 | 5.48    | 15.47 | 28.21 | 43.88 |

In order to facilitate comparison, we have included a performance analysis with a single front onboard camera from the FordAV-CVL dataset, as depicted in Fig. 1.

Table 3: Performance of our method in different initial pose of the FordAV-CVL dataset

| translation<br>m | yaw<br>° | Lateral |         |        |       |       |       | Longitudinal |         |        |       |       |       | Yaw   |         |       |       |       |  |
|------------------|----------|---------|---------|--------|-------|-------|-------|--------------|---------|--------|-------|-------|-------|-------|---------|-------|-------|-------|--|
|                  |          | mean↓   | median↓ | 0.25m↑ | 0.5m↑ | 1m↑   | 2m↑   | mean↓        | median↓ | 0.25m↑ | 0.5m↑ | 1m↑   | 2m↑   | mean↓ | median↓ | 1°↑   | 2°↑   | 4°↑   |  |
| 15               | 7.5      | 0.66    | 0.49    | 26.84  | 51.07 | 81.13 | 97.90 | 1.25         | 0.61    | 23.20  | 43.30 | 68.74 | 85.53 | 1.22  | 0.62    | 68.62 | 87.22 | 94.79 |  |
|                  | 10       | 0.74    | 0.50    | 26.40  | 50.01 | 79.61 | 96.58 | 1.58         | 0.64    | 22.22  | 41.55 | 65.80 | 81.96 | 1.61  | 0.64    | 66.92 | 85.03 | 92.79 |  |
|                  | 12.5     | 1.09    | 0.53    | 25.57  | 47.92 | 76.15 | 93.02 | 2.15         | 0.72    | 20.32  | 38.35 | 61.24 | 76.29 | 2.84  | 0.69    | 63.22 | 80.65 | 88.87 |  |
|                  | 15       | 1.71    | 0.58    | 23.52  | 44.12 | 69.72 | 86.49 | 3.24         | 1.02    | 16.23  | 30.74 | 49.69 | 63.51 | 4.65  | 0.86    | 54.61 | 71.31 | 80.57 |  |
| 30               | 5        | 0.60    | 0.45    | 27.10  | 54.47 | 84.30 | 97.62 | 1.03         | 0.50    | 25.65  | 49.85 | 73.28 | 88.00 | 1.04  | 0.61    | 71.87 | 92.41 | 97.36 |  |
| 45               |          | 0.72    | 0.50    | 26.72  | 49.96 | 79.48 | 96.18 | 1.21         | 0.61    | 22.86  | 42.70 | 68.03 | 85.31 | 2.11  | 0.65    | 66.39 | 84.53 | 91.99 |  |
| 60               |          | 0.93    | 0.53    | 25.39  | 47.17 | 74.75 | 92.12 | 1.43         | 0.67    | 22.01  | 40.50 | 64.21 | 81.03 | 4.88  | 0.72    | 61.51 | 78.44 | 85.70 |  |

To bring a comprehensive view of the data and enable readers to analyze the metrics more thoroughly, we further provide complete metrics results in Tab. 2 and Tab. 3, as a supplementary of the chat illustration in Fig. 7 in our main paper. In order to facilitate comparison, we have included a performance analysis with a single front onboard camera from the FordAV-CVL dataset, as depicted in Fig. 1.

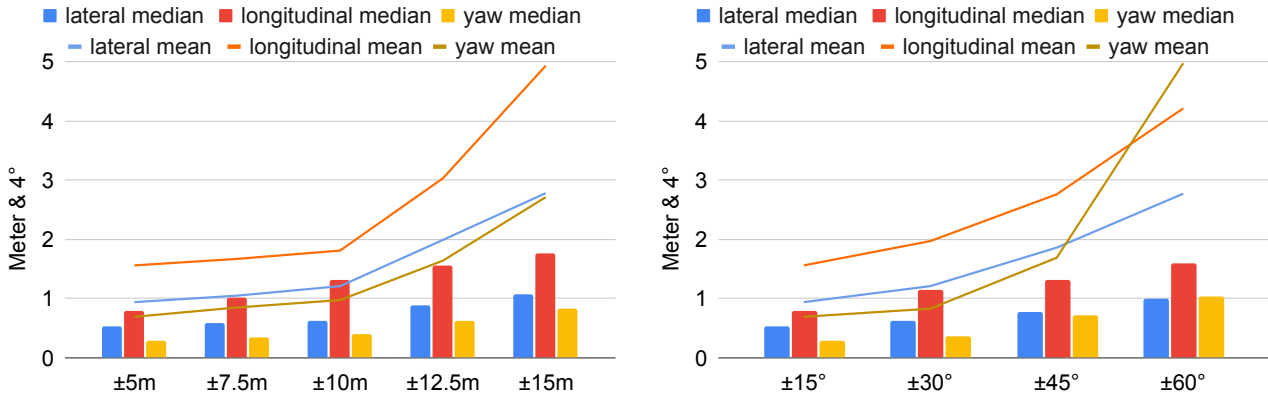

Figure 1: Impact of Initial Pose with one front camera setting in FordAV-CVL dataset. (left) Method performance as initial pose translation varies, with orientation noise fixed within  $\pm 15^\circ$  range. (right) Method performance as initial pose orientation varies, with translation noise fixed within  $\pm 5m$  range. The vertical axis shows translation error in units of m and orientation error in units of  $4^\circ$ .

### 3. Visualization of Confidence Maps

The main paper provides an example of the view-consistent confidence map  $V$ , the on-ground confidence map  $O$ , and the fused confidence map  $C$  of the KITTI-CVL dataset. Additionally, we present an example of the FordAV-CVL dataset in Fig. 2. In addition, we have generated confidence map videos of continuous trajectories in both the KITTI-CVL and FordAV-CVL datasets, which can be found in the supplementary video.

### References

[1] Shan Wang, Yanhao Zhang, Ankit Vora, Akhil Perincherry, and Hengdong Li. Satellite image based cross-view localization for autonomous vehicle. In *2023 IEEE International Conference on Robotics and Automation (ICRA)*, pages 3592–3599. IEEE, 2023.

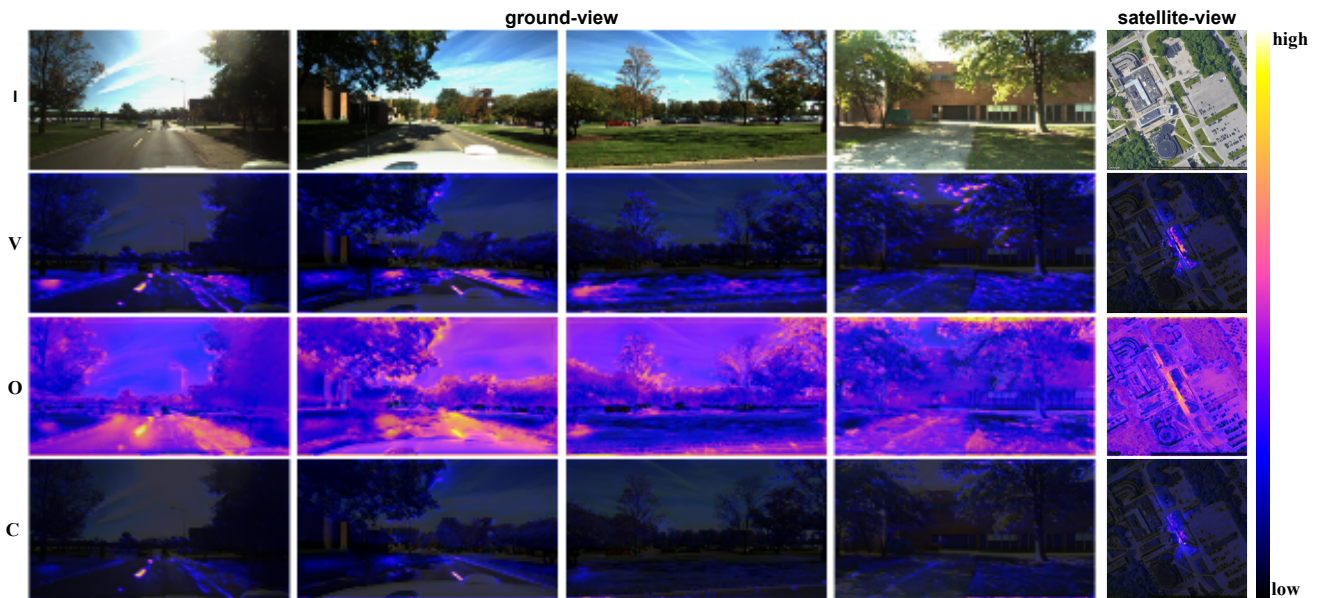

Figure 2: Illustration of confidence maps in FordAV-CVL dataset. The view-consistent confidence map ( $2^{nd}$  row)  $V$  assigns high confidence to objects that appear consistently in both ground-view and satellite images, such as road marks, and curbs. Conversely, the confidence map assigns low confidence to temporally inconsistent objects, such as vehicles and pedestrians. The on-ground confidence map ( $3^{rd}$  row)  $O$  highlights only on-ground cues. It is noteworthy that the on-ground confidence map  $O$  assigns a high score to the sky and tree leaves. This is because the algorithm only uses key points located under the focal point of ground-view images. Consequently, objects that only exist in the upper part of ground-view images are not supervised and do not affect the localization. The fused confidence map ( $4^{th}$  row)  $C$  highlights objects that are both view-consistent and on-ground.
